# Supplementary material for: Hypocotyl Transcriptome Reveals Auxin Regulation of Growth-Promoting Genes through GA-Dependent and -Independent Pathways
Source: PLoS One. 2012 May 9;7(5):e36210. doi: 10.1371/journal.pone.0036210 (PMC3348943; doi:10.1371/journal.pone.0036210)
Supplement: Table S6 — Genes and microarray datasets presented in Figure 7B, auxin-induced genes. (XLSX) [file pone.0036210.s011.xlsx]

## Sheet: Sheet1
Table S6. Microarray data and column identification for Figure 8A, auxin-induced genes.
Locus ID	Leivar Wtseed_WTD up in WTD	Nozue upG	Leivar WTRc_WTD down in WTRc	Leivar WTR1_pifqR1 down in pifqR1	Leivar WTD_pifqD down in pifqD	Nozue upG PIF4/5	Ma DL	Jamet	Leivar Wtseed_WTD down in WTD	Ma upL	Nozue upS	Leivar WTR1_pifqR1 up in pifqR1	Nozue upS PIF4/5	Leivar WTD_pifqD up in pifqD	Leivar WTRc_WTD up in WTRc
AT4G25420	0	0	1	0	0	1	0	0	0	0	0	0	0	0	0
AT2G23170	1	0	0	0	0	1	0	0	0	1	0	0	0	0	0
AT5G47370	1	0	0	0	0	1	1	0	0	0	0	0	0	0	0
AT3G14370	1	0	1	1	1	1	0	0	0	0	0	0	0	0	0
AT4G27260	1	0	0	0	0	1	0	0	0	0	0	0	0	0	0
AT4G37770	0	0	0	0	0	1	0	0	0	0	0	0	0	0	0
AT4G22780	1	0	0	0	0	1	0	0	0	0	0	0	0	0	0
AT3G59900	1	0	1	0	0	1	0	0	0	0	0	0	0	0	0
AT5G15160	0	0	0	0	0	1	0	0	0	0	0	0	0	0	0
AT1G18400	1	0	1	0	1	1	0	0	0	0	0	0	0	0	0
AT3G28180	1	0	1	0	0	1	0	1	0	0	0	0	0	0	0
AT4G16670	1	0	1	0	1	1	0	0	0	0	0	0	0	0	0
AT1G69570	1	0	1	0	0	1	0	0	0	0	0	0	0	0	0
AT3G54510	0	0	1	0	1	1	0	0	0	0	0	0	0	0	0
AT4G37890	0	0	1	0	0	1	1	0	0	0	0	0	0	0	0
AT5G25190	0	0	0	0	0	1	0	0	1	0	0	0	0	0	0
AT5G22500	1	0	1	1	1	1	0	0	0	0	0	0	0	0	0
AT2G14900	1	0	1	0	1	1	0	1	0	0	0	0	0	0	0
AT3G50890	1	0	0	0	0	1	0	0	0	0	0	0	0	0	0
AT5G53980	1	0	1	0	1	1	0	0	0	0	0	0	0	0	0
AT1G52830	1	0	1	0	0	1	0	0	0	0	0	0	0	0	0
AT4G14560	1	0	0	0	0	1	0	0	0	0	0	0	0	0	0
AT3G15540	1	0	1	0	1	1	0	0	0	0	0	0	0	0	0
AT3G23030	1	0	1	0	0	1	0	0	0	0	0	0	0	0	0
AT4G32280	1	0	1	0	1	1	0	0	0	0	0	0	0	0	0
AT5G06930	1	0	0	0	0	1	0	0	0	0	0	0	0	0	0
AT5G15580	1	0	1	0	0	1	0	0	0	0	0	0	0	0	0
AT3G02170	1	0	0	0	0	1	0	0	0	0	0	0	0	0	0
AT1G64660	0	0	1	0	1	1	1	0	0	0	0	0	0	0	0
AT4G39390	1	0	0	0	0	1	0	0	0	0	0	0	0	0	0
AT5G39860	1	0	0	0	0	1	0	0	0	0	0	1	0	0	0
AT5G04190	1	0	0	0	0	1	0	0	0	0	0	0	0	1	0
AT1G70940	1	0	0	0	0	1	0	0	0	0	0	0	0	0	0
AT4G25260	1	0	1	1	1	1	1	1	0	0	0	0	0	0	0
AT5G46240	1	0	0	0	0	1	0	0	0	0	0	0	0	0	0
AT5G62280	1	0	1	0	0	1	1	0	0	0	0	0	0	0	0
AT4G09890	1	0	1	0	0	1	0	0	0	0	0	0	0	0	0
AT5G02760	1	0	0	0	0	1	0	0	0	0	0	1	0	1	1
AT1G65920	1	0	1	0	1	1	0	0	0	0	0	0	0	0	0
AT4G16515	1	0	1	0	0	1	0	1	0	0	0	1	0	0	0
AT1G29500	1	0	1	0	0	1	0	0	0	0	0	1	0	0	0
AT4G34770	1	0	1	0	1	1	0	0	0	0	0	0	0	0	0
AT4G36110	1	0	1	0	1	1	0	0	0	0	0	0	0	0	0
AT5G18060	1	0	1	0	1	1	0	0	0	0	0	0	0	0	0
AT5G63650	1	0	1	1	1	1	0	0	0	0	0	0	0	0	0
AT5G07010	0	0	1	0	1	1	1	0	0	0	0	0	0	0	0
AT2G35880	1	0	0	0	0	1	0	0	0	0	0	0	0	0	0
AT3G29370	1	0	1	0	0	1	0	0	0	0	0	0	0	0	0
AT3G42800	1	0	1	0	0	1	0	0	0	0	0	0	0	0	0
AT3G50340	0	0	0	0	0	1	0	0	0	0	0	0	0	0	0
AT5G50335	1	0	0	0	0	1	0	0	0	0	0	1	0	0	0
AT5G52900	1	0	0	0	0	1	0	0	0	0	0	0	0	0	0
AT4G02330	1	1	0	0	1	0	0	1	0	0	0	0	0	0	0
AT3G58120	1	1	0	0	0	0	1	0	0	0	0	0	0	0	0
AT4G17460	1	1	0	0	0	0	0	0	0	0	0	0	0	0	0
AT2G22810	0	1	0	0	0	0	0	0	0	0	0	0	0	0	0
AT5G65800	1	1	1	0	1	0	0	0	0	0	0	0	0	0	0
AT1G68560	0	1	1	1	1	0	0	1	0	0	0	0	0	0	0
AT1G02660	1	1	1	0	0	0	0	0	0	0	0	0	0	0	0
AT1G80280	1	1	0	0	0	0	1	0	0	0	0	0	0	0	0
AT2G40000	0	1	1	0	0	0	0	0	0	0	0	0	0	0	0
AT1G76240	1	1	1	0	1	0	0	0	0	0	0	0	0	0	0
AT3G51410	0	1	1	0	1	0	0	0	0	0	0	0	0	0	0
AT5G08130	0	1	0	1	0	0	0	0	0	0	0	0	0	0	0
AT2G44080	0	1	1	0	0	0	0	0	0	0	0	0	0	0	0
AT1G27210	1	1	0	0	0	0	0	0	0	0	0	0	0	0	0
AT5G43700	1	1	0	0	0	0	0	0	0	0	0	0	0	0	0
AT1G19220	0	1	0	0	0	0	0	0	0	0	0	0	0	0	0
AT4G36780	1	1	0	0	0	0	0	0	0	0	0	0	0	0	0
AT1G23060	1	1	0	1	0	0	1	0	0	0	0	0	0	0	0
AT4G27280	1	1	0	0	0	0	0	0	0	0	0	0	0	0	0
AT4G31000	1	1	0	0	0	0	0	0	0	0	0	0	0	0	0
AT5G66590	0	1	1	1	1	0	1	0	0	0	0	0	0	0	0
AT1G09460	1	1	0	0	0	0	0	1	0	0	0	0	0	0	0
AT2G17880	1	1	0	0	0	0	0	0	0	0	0	1	0	1	0
AT1G15040	1	1	1	0	0	0	0	0	0	0	0	1	0	0	0
AT1G30820	0	1	0	0	0	0	0	0	0	1	0	0	0	0	0
AT4G23180	1	1	0	0	0	0	0	0	0	1	0	0	0	0	0
AT5G09970	0	1	0	0	0	0	0	0	1	0	0	0	0	0	0
AT1G75450	1	1	1	0	1	0	0	0	0	0	0	0	0	0	0
AT2G34930	0	1	0	0	0	0	0	0	0	0	0	0	0	0	0
AT3G12710	1	1	0	0	0	0	0	0	0	0	0	0	0	0	0
AT3G12610	1	1	1	1	0	0	0	0	0	0	0	0	0	0	0
AT5G54510	1	1	0	0	0	0	0	0	0	1	0	0	0	0	0
AT1G64640	1	1	1	1	1	0	0	0	0	0	0	0	0	0	0
AT4G19120	1	1	0	1	1	0	0	0	0	0	0	0	0	0	0
AT5G54500	1	1	0	0	0	0	0	0	0	0	0	0	0	0	0
AT1G21910	1	1	0	0	0	0	0	0	0	0	0	0	0	0	0
AT1G77640	0	1	0	0	0	0	0	0	0	0	0	0	0	0	0
AT1G20900	0	1	1	1	1	0	0	0	0	0	0	0	0	0	0
AT3G23150	0	1	1	0	0	0	0	1	1	0	0	0	0	0	0
AT3G25730	1	1	1	0	1	0	0	0	0	0	0	0	0	0	0
AT2G40940	1	1	0	0	0	0	0	0	0	0	0	0	0	0	0
AT1G04310	0	1	0	0	0	0	1	0	0	0	0	0	0	0	0
AT1G05010	1	1	0	0	0	0	0	0	0	1	0	1	0	1	1
AT3G54400	1	1	0	0	0	0	0	1	0	0	0	0	0	0	0
AT4G38400	1	1	1	0	1	0	0	1	0	0	0	0	0	0	0
AT3G45960	0	1	0	0	0	0	0	1	0	1	0	0	0	0	0
AT5G02200	0	1	1	0	1	0	0	0	0	0	0	0	0	0	0
AT3G28340	1	1	1	0	1	0	0	1	0	0	0	0	0	0	0
AT4G18970	1	1	0	0	0	0	0	0	0	0	0	0	0	0	0
AT1G14920	0	1	0	0	0	0	0	0	1	0	0	0	0	0	0
AT4G21200	0	1	0	1	0	0	0	0	0	0	0	0	0	0	0
AT5G51810	0	1	0	0	0	0	1	0	1	0	0	0	0	0	0
AT1G74670	0	1	0	0	0	0	0	1	0	0	0	1	0	1	1
AT3G47340	0	1	1	0	0	0	1	0	0	0	0	1	0	1	0
AT5G24580	1	1	1	1	1	0	0	0	0	0	0	0	0	0	0
AT5G67060	1	1	0	1	0	0	0	0	0	0	0	0	0	0	0
AT5G15150	1	1	1	1	1	0	0	0	0	0	0	0	0	0	0
AT2G39980	0	1	1	0	0	0	0	0	1	1	0	0	0	0	0
AT5G01210	1	1	0	0	0	0	0	0	0	1	0	0	0	0	0
AT2G43060	1	1	1	0	1	0	0	0	0	0	0	0	0	0	0
AT1G15580	0	1	0	0	0	0	0	0	0	0	0	0	0	1	0
AT4G23060	0	1	0	0	0	0	0	0	1	0	0	0	0	0	0
AT2G42430	0	1	0	0	0	0	0	0	1	0	0	0	0	0	0
AT1G34110	1	1	1	0	0	0	0	0	0	0	0	0	0	0	0
AT1G25320	0	1	0	0	0	0	0	0	0	0	0	0	0	0	0
AT1G11000	1	1	1	0	0	0	0	0	0	0	0	0	0	0	0
AT3G09940	1	1	0	1	0	0	0	0	0	0	0	0	0	0	0
AT2G19800	1	1	0	0	0	0	0	0	0	0	0	0	0	0	0
AT5G28290	0	1	0	0	0	0	0	0	0	0	0	0	0	0	0
AT1G27460	1	1	0	0	0	0	0	0	0	0	0	0	0	0	0
AT5G01740	0	1	0	0	0	0	0	0	0	0	0	1	0	0	0
AT4G36010	0	1	1	0	1	0	0	1	1	0	0	0	0	0	0
AT3G07010	1	1	0	0	0	0	0	1	0	0	0	0	0	0	0
AT5G23870	1	1	1	0	0	0	0	0	0	0	0	0	0	0	0
AT2G41480	0	1	0	0	0	0	0	1	0	0	0	0	0	0	0
AT5G39580	1	1	1	0	0	0	0	1	0	0	0	0	0	0	0
AT3G62090	0	1	1	0	1	0	0	0	1	0	0	0	0	0	0
AT5G54490	1	1	0	0	0	0	0	0	0	0	0	1	0	0	0
AT3G10720	1	1	0	0	0	0	0	1	0	0	0	0	0	0	0
AT1G62770	1	1	1	0	0	0	1	0	0	0	0	0	0	0	0
AT5G62340	1	1	0	0	0	0	0	0	0	0	0	0	0	0	0
AT5G06870	0	1	0	0	0	0	0	0	0	0	0	0	0	0	0
AT5G49700	0	1	0	0	0	0	0	0	1	0	0	0	0	0	0
AT3G55740	0	1	0	0	0	0	0	0	0	0	0	0	0	0	0
AT2G21140	1	1	1	1	0	0	1	1	0	0	0	0	0	0	0
AT1G51940	1	1	0	0	0	0	0	1	0	0	0	0	0	0	0
AT3G54030	1	1	0	0	0	0	0	0	0	0	0	0	0	0	0
AT5G59010	1	1	1	1	0	0	0	0	0	0	0	0	0	0	0
AT1G64460	1	1	0	0	0	0	1	0	0	0	0	0	0	0	0
AT3G01490	0	1	0	0	0	0	0	0	1	0	0	0	0	0	0
AT3G44610	1	1	0	0	0	0	0	0	0	0	0	0	0	0	0
AT3G59350	0	1	1	0	0	0	0	0	0	0	0	0	0	0	0
AT1G19380	1	1	1	0	0	0	0	0	0	0	0	0	0	0	0
AT3G50350	0	1	0	0	0	0	0	0	0	0	0	0	0	0	0
AT5G44250	0	1	0	0	0	0	1	0	1	0	0	0	0	0	0
AT5G66080	0	1	1	0	1	0	0	0	1	0	0	0	0	0	0
AT5G45750	0	1	0	0	0	0	0	0	0	0	0	0	0	0	0
AT1G55450	1	1	0	0	0	0	0	0	0	0	0	0	0	0	0
AT1G29440	1	1	1	0	0	0	0	0	0	0	0	1	0	0	0
AT1G29450	1	1	1	0	0	0	0	0	0	0	0	0	0	0	0
AT1G29460	1	1	1	0	0	0	0	0	0	0	0	0	0	0	0
AT1G29490	1	1	1	0	0	0	0	0	0	0	0	1	0	0	0
AT2G18010	1	1	1	0	0	0	0	0	0	0	0	0	0	0	0
AT3G03830	1	1	1	0	0	0	0	0	0	0	0	0	0	0	0
AT3G03840	1	1	1	0	0	0	0	0	0	0	0	0	0	0	0
AT1G04240	1	1	1	0	0	0	0	0	0	0	0	0	0	0	0
AT4G38850	1	1	0	0	0	0	0	0	0	0	0	0	0	0	0
AT1G29510	1	1	1	0	0	0	0	0	0	0	0	0	0	0	0
AT2G22830	0	1	0	0	0	0	0	0	0	0	0	0	0	0	0
AT3G60980	0	1	0	0	0	0	0	0	0	0	0	0	0	0	0
AT2G42580	1	1	0	0	0	0	0	0	0	0	0	0	0	0	0
AT3G58620	1	1	0	0	0	0	0	0	0	0	0	0	0	0	0
AT4G01870	0	1	0	0	0	0	0	0	1	0	0	0	0	0	0
AT2G41100	1	1	0	0	0	0	0	0	0	1	0	1	0	0	0
AT2G18700	0	1	0	0	0	0	1	0	0	0	0	0	0	0	0
AT1G21830	1	1	0	0	0	0	0	0	0	0	0	0	0	0	0
AT1G36940	1	1	0	0	0	0	0	0	0	0	0	0	0	0	0
AT1G54120	1	1	0	0	0	0	0	0	0	0	0	0	0	0	0
AT2G36220	0	1	1	0	0	0	0	0	1	0	0	0	0	0	0
AT3G03170	0	1	1	0	1	0	0	0	0	0	0	0	0	0	0
AT3G60200	0	1	0	0	0	0	0	0	0	0	0	0	0	0	0
AT4G39840	1	1	0	0	1	0	0	1	0	1	0	0	0	0	0
AT5G05180	1	1	0	0	0	0	0	0	0	0	0	0	0	0	0
AT5G22270	0	1	0	0	0	0	0	0	0	0	0	0	0	1	0
AT5G22310	1	1	0	0	0	0	0	0	0	0	0	0	0	0	0
AT5G25210	0	1	0	0	0	0	0	0	1	0	0	0	0	0	0
AT5G49170	1	1	0	0	0	0	0	0	0	0	0	0	0	0	0
AT5G62170	0	1	0	0	0	0	0	0	0	0	0	0	0	0	0
AT5G67020	1	1	1	0	0	0	0	0	0	0	0	0	0	0	0
AT3G04910	1	1	0	0	0	0	0	0	0	0	0	0	0	0	0
AT1G65310	1	1	1	0	0	0	0	0	0	0	0	0	0	0	0
AT4G30290	1	1	1	1	1	0	0	1	0	0	0	0	0	0	0
AT1G11545	1	1	1	0	0	0	0	1	0	0	0	0	0	0	0
AT1G10550	1	1	1	0	1	0	1	0	0	0	0	0	0	0	0
AT2G22680	0	1	1	0	0	0	0	0	1	0	0	0	0	0	0
AT5G44260	0	1	1	0	0	0	0	0	1	0	0	0	0	0	0
AT5G55630	1	0	0	0	0	0	0	0	0	0	0	0	0	0	0
AT3G27580	1	0	0	0	0	0	0	0	0	0	0	0	0	0	0
AT4G37390	0	0	0	0	0	0	0	0	1	0	0	0	0	0	0
AT3G25900	1	0	0	0	0	0	0	0	0	0	0	0	0	0	0
AT5G16590	1	0	1	1	1	0	1	1	0	0	0	0	0	0	0
AT2G41280	0	0	1	1	1	0	0	0	1	0	0	0	0	0	0
AT5G41880	1	0	0	0	0	0	0	0	0	0	0	0	0	0	0
AT5G18700	1	0	0	0	0	0	0	0	0	0	0	0	0	0	0
AT4G12120	0	0	0	0	0	0	0	0	1	0	0	0	0	0	0
AT4G12420	1	0	0	0	0	0	0	1	0	0	0	0	0	0	0
AT2G04040	0	0	0	0	0	0	0	0	1	0	0	0	0	0	0
AT2G34150	1	0	0	0	0	0	0	0	0	0	0	0	0	0	0
AT4G08040	1	0	0	0	0	0	0	0	0	0	0	0	0	0	0
AT1G01120	1	0	1	0	0	0	0	0	0	1	0	0	0	0	0
AT5G56030	0	0	0	0	0	0	0	0	1	0	1	0	0	0	0
AT4G26080	0	0	0	0	0	0	0	0	1	0	0	0	0	0	0
AT1G55870	0	0	0	0	0	0	0	0	1	0	0	0	0	0	0
AT2G39350	1	0	1	0	1	0	0	0	0	0	1	0	0	0	0
AT1G69260	0	0	0	0	0	0	0	0	0	0	1	0	0	0	0
AT3G29575	1	0	1	1	1	0	0	0	0	0	0	0	0	0	0
AT3G12110	1	0	0	0	0	0	0	0	0	0	0	0	0	0	0
AT1G10740	1	0	1	0	0	0	0	0	0	0	0	0	0	0	0
AT1G52750	0	0	0	0	0	0	1	0	0	0	0	0	0	0	0
AT1G73480	0	0	0	0	0	0	0	0	1	1	0	0	0	0	0
AT5G54710	0	0	0	0	0	0	0	0	0	1	0	0	0	0	0
AT2G37940	1	0	0	0	0	0	0	0	0	0	0	0	0	0	0
AT4G35110	1	0	0	0	0	0	0	0	0	0	0	0	0	0	0
AT5G27000	0	0	0	1	0	0	0	0	0	0	0	0	0	0	0
AT4G05190	1	0	0	0	0	0	0	0	0	0	0	0	0	0	0
AT2G22470	1	0	1	1	1	0	0	0	0	1	0	0	0	0	0
AT2G14890	1	0	0	0	0	0	0	1	0	0	0	0	0	0	0
AT5G09800	0	0	0	0	0	0	0	0	1	0	0	0	0	0	0
AT5G66200	1	0	0	0	0	0	0	0	0	0	0	0	0	0	0
AT2G36910	1	0	0	0	0	0	0	0	0	0	0	0	0	0	0
AT5G66310	1	0	0	0	0	0	0	0	0	0	0	0	0	0	0
AT3G25610	1	0	0	0	0	0	0	0	0	0	0	0	0	0	0
AT1G27770	1	0	1	0	1	0	0	0	0	0	0	0	0	0	0
AT3G60640	0	0	0	0	0	0	0	0	1	0	0	0	0	0	0
AT4G12980	0	0	0	0	0	0	0	0	0	0	1	1	0	0	1
AT3G49670	1	0	0	0	0	0	0	1	0	0	0	0	0	0	0
AT5G50915	1	0	1	0	0	0	0	0	0	0	0	0	0	0	0
AT2G40620	1	0	0	0	0	0	0	0	0	0	0	0	0	0	0
AT5G28510	0	0	0	0	0	0	0	0	0	1	0	0	0	0	0
AT1G47600	1	0	0	0	0	0	0	0	0	0	0	0	0	0	0
AT5G18670	1	0	0	0	0	0	0	0	0	0	0	0	0	0	0
AT5G63810	1	0	1	1	1	0	0	1	0	0	0	0	0	0	0
AT3G43720	1	0	0	0	0	0	0	1	0	0	0	0	0	0	0
AT4G22520	0	0	0	0	0	0	0	0	0	1	0	0	0	0	0
AT3G54810	1	0	0	0	0	0	0	0	0	0	0	0	0	0	0
AT5G20230	0	0	0	0	0	0	0	1	1	1	0	0	0	0	0
AT1G64670	1	0	0	0	0	0	1	1	0	0	0	0	0	0	0
AT1G75080	1	0	0	0	0	0	0	0	0	0	0	0	0	0	0
AT3G13380	0	0	0	0	0	0	0	0	1	0	0	0	0	0	0
AT5G04020	1	0	0	0	0	0	0	0	0	0	0	0	0	0	0
AT3G03000	1	0	0	0	0	0	1	0	0	0	0	0	0	0	0
AT5G12850	1	0	0	0	0	0	0	0	0	0	0	0	0	0	0
AT2G22125	1	0	0	0	0	0	0	0	0	0	0	0	0	0	0
AT3G03050	1	0	0	0	0	0	0	0	0	0	0	0	0	0	0
AT5G16910	1	0	0	1	0	0	0	0	0	0	0	0	0	0	0
AT4G07960	0	0	0	0	0	0	0	1	0	0	0	0	0	0	0
AT5G26220	0	0	0	0	0	0	0	0	0	0	1	0	0	0	0
AT3G44740	0	0	0	0	0	0	0	0	1	0	0	0	0	0	0
AT3G51890	0	0	1	0	0	0	0	0	1	0	0	0	0	0	0
AT4G13195	1	0	0	0	0	0	0	0	0	0	0	0	0	0	0
AT4G16120	0	0	0	0	0	0	0	1	0	0	0	0	0	0	0
AT2G25460	0	0	0	0	0	0	0	0	0	1	0	0	0	0	0
AT5G18440	0	0	0	0	0	0	0	0	1	0	0	0	0	0	0
AT4G17350	1	0	1	0	0	0	0	0	0	0	0	0	0	0	0
AT4G30060	1	0	1	1	1	0	0	0	0	0	0	0	0	0	0
AT4G34530	0	0	0	0	0	0	1	0	0	0	0	0	0	0	0
AT5G18470	0	0	0	0	0	0	0	0	1	0	0	0	0	0	0
AT5G64660	1	0	0	0	0	0	0	0	0	0	0	0	0	0	0
AT4G23220	0	0	0	0	0	0	0	0	0	1	0	0	0	0	0
AT1G17060	0	0	1	0	0	0	0	0	0	0	0	0	0	0	0
AT3G14620	0	0	0	0	0	0	0	0	0	0	1	0	0	0	0
AT1G01600	1	0	1	0	1	0	0	0	0	0	0	0	0	0	0
AT5G53290	0	0	0	0	0	0	0	0	1	0	0	0	0	0	0
AT1G61100	1	0	0	0	0	0	0	0	0	0	0	0	0	0	0
AT3G04210	0	0	0	0	0	0	0	0	0	1	0	0	0	0	0
AT5G44680	1	0	0	0	0	0	1	0	0	0	0	1	0	1	1
AT5G44670	1	0	1	0	0	0	0	0	0	0	0	0	0	0	0
AT1G08500	1	0	1	1	1	0	1	1	0	0	0	0	0	0	0
AT3G30775	1	0	0	0	0	0	0	0	0	0	0	0	0	0	0
AT3G12670	0	0	0	0	0	0	0	0	1	0	0	0	0	0	0
AT1G79280	0	0	0	0	0	0	0	0	1	0	0	0	0	0	0
AT1G75490	0	0	0	0	0	0	0	0	1	0	0	0	0	0	0
AT1G44830	1	0	1	0	1	0	0	0	0	0	0	0	0	0	0
AT1G36060	0	0	0	0	0	0	1	0	1	0	0	0	0	0	0
AT3G06080	0	0	0	0	0	0	0	0	0	0	0	1	0	1	1
AT2G41110	1	0	0	0	0	0	0	0	0	0	0	0	0	0	0
AT2G41070	1	0	1	1	1	0	0	0	0	0	0	0	0	0	0
AT1G17440	0	0	0	0	0	0	0	0	1	0	0	0	0	0	0
AT3G26840	0	0	0	0	0	0	0	0	0	1	0	0	0	0	0
AT1G07000	1	0	0	0	0	0	0	0	0	0	0	0	0	0	0
AT1G72470	1	0	1	1	1	0	0	0	0	0	0	0	0	0	0
AT5G61010	0	0	0	0	0	0	0	0	0	0	1	0	0	0	0
AT3G15370	0	0	0	0	0	0	0	1	0	0	0	0	0	0	0
AT1G69530	0	0	0	0	0	0	0	1	1	1	0	0	0	1	1
AT1G26770	0	0	0	0	0	0	0	1	1	0	1	0	0	1	1
AT1G62980	1	0	0	1	1	0	1	0	0	0	0	0	0	0	0
AT1G12560	1	0	0	0	0	0	0	0	0	0	0	0	0	0	0
AT3G45970	1	0	1	0	0	0	0	0	0	0	0	0	0	0	0
AT5G57780	1	0	0	0	0	0	0	0	0	0	0	0	0	0	0
AT1G61340	0	0	0	0	0	0	0	0	1	1	0	0	0	0	0
AT4G20830	0	0	0	0	1	0	0	0	0	0	0	0	0	0	0
AT3G25500	1	0	0	0	0	0	0	0	0	0	0	0	0	0	0
AT5G54650	1	0	0	0	0	0	0	0	0	0	0	0	0	0	0
AT5G22940	1	0	0	0	0	0	0	1	0	0	0	0	0	0	0
AT4G32460	1	0	1	1	1	0	0	1	0	0	0	0	0	0	0
AT3G62660	1	0	0	0	0	0	0	1	0	0	0	0	0	0	0
AT4G39640	1	0	0	0	0	0	0	0	0	0	0	0	0	0	0
AT5G37500	1	0	0	0	0	0	0	0	0	0	0	0	0	0	0
AT5G45670	1	0	0	0	0	0	0	1	0	0	0	0	0	0	0
AT1G15550	1	0	0	1	1	0	0	0	0	0	0	0	0	0	0
AT1G79840	1	0	0	0	0	0	0	0	0	0	0	0	0	0	0
AT1G02930	0	0	1	1	1	0	0	0	0	0	0	0	0	0	0
AT5G62220	0	0	0	0	0	0	0	1	0	0	0	0	0	0	1
AT2G41640	1	0	1	0	0	0	0	0	0	0	0	0	0	0	0
AT3G17420	1	0	0	1	1	0	1	0	0	0	0	0	0	0	0
AT1G67930	1	0	0	0	0	0	0	0	0	0	0	0	0	0	0
AT5G23350	1	0	0	0	0	0	0	0	0	0	0	0	0	0	0
AT4G00850	0	0	0	0	0	0	0	0	1	0	0	0	0	0	0
AT1G33240	1	0	0	0	0	0	1	0	0	0	0	0	0	0	0
AT3G60630	1	0	0	0	0	0	0	0	0	0	0	0	0	0	0
AT4G22590	0	0	0	0	0	0	0	0	0	1	0	0	0	0	0
AT5G65140	0	0	0	0	0	0	0	0	1	0	0	0	0	0	0
AT5G02490	0	0	0	0	0	0	0	0	0	0	1	0	0	0	0
AT3G23640	1	0	0	0	0	0	0	0	0	0	0	0	0	0	0
AT1G58220	0	0	0	0	0	0	0	0	1	0	0	0	0	0	0
AT1G52560	0	0	0	0	0	0	0	0	1	0	0	0	0	0	0
AT3G45230	1	0	0	0	0	0	0	0	0	0	0	0	0	0	0
AT4G10020	0	0	1	1	1	0	0	0	1	0	0	0	0	0	0
AT3G23050	1	0	1	0	0	0	0	0	0	0	0	0	0	0	0
AT3G62100	0	0	0	0	0	0	0	0	1	0	0	0	0	0	0
AT5G56730	0	0	0	0	0	0	0	0	1	0	0	0	0	0	0
AT1G79700	1	0	0	0	0	0	0	0	0	0	0	0	0	0	0
AT3G59690	1	0	1	0	0	0	1	0	0	0	0	0	0	0	0
AT1G19870	1	0	0	0	0	0	0	0	0	0	0	0	0	0	0
AT1G19180	0	0	0	0	0	0	0	0	1	1	0	0	0	0	0
AT3G17860	0	0	0	0	0	0	0	0	1	0	0	0	0	0	0
AT5G12220	0	0	0	0	0	0	0	0	1	0	0	0	0	0	0
AT4G01410	0	0	1	0	1	0	0	0	0	0	0	0	0	0	0
AT2G03850	1	0	0	0	0	0	0	0	0	0	0	0	0	0	0
AT5G56040	1	0	0	0	0	0	0	0	0	0	0	0	0	0	0
AT5G12940	1	0	1	1	1	0	0	1	0	0	0	0	0	0	0
AT1G51820	0	0	0	0	0	0	0	0	0	1	0	0	0	0	0
AT2G41820	1	0	0	0	0	0	0	0	0	0	0	0	0	0	0
AT1G62440	1	0	0	0	0	0	1	1	0	0	0	0	0	0	0
AT1G09520	0	0	0	0	0	0	0	0	1	0	0	0	0	0	0
AT2G28305	1	0	0	0	0	0	0	0	0	0	1	0	0	0	0
AT5G56170	1	0	0	0	0	0	0	1	0	0	0	0	0	0	0
AT1G59740	0	0	0	0	0	0	0	0	0	0	1	0	0	0	0
AT5G13400	1	0	0	0	0	0	0	0	0	0	0	0	0	0	0
AT4G29140	1	0	1	1	1	0	0	0	0	0	0	0	0	0	0
AT3G02570	1	0	0	0	0	0	0	0	0	0	0	0	0	0	0
AT2G30040	1	0	0	1	0	0	0	0	0	1	0	0	0	0	0
AT2G43290	1	0	0	0	0	0	0	0	0	0	0	0	0	0	0
AT3G13080	0	0	0	0	0	0	0	0	1	0	0	0	0	0	0
AT2G20370	1	0	0	0	0	0	0	1	0	0	0	0	0	0	0
AT4G01680	1	0	1	0	0	0	1	0	0	0	0	0	0	0	0
AT1G64330	0	0	0	0	0	0	1	0	0	0	0	0	0	0	0
AT5G52280	1	0	0	1	0	0	0	0	0	0	0	0	0	0	0
AT2G37540	1	0	0	0	0	0	0	0	0	0	0	0	0	0	0
AT3G26760	1	0	0	0	0	0	0	0	0	0	0	0	0	0	0
AT4G05020	0	0	0	0	0	0	0	0	1	0	0	0	0	0	0
AT4G37590	1	0	0	0	0	0	0	0	0	0	0	0	0	0	0
AT3G44200	1	0	0	0	0	0	0	0	0	0	0	0	0	0	0
AT1G30100	0	0	0	0	0	0	0	0	1	0	0	0	0	0	0
AT1G69870	0	0	0	0	0	0	0	0	1	0	1	0	0	0	0
AT2G18220	0	0	0	0	0	0	0	0	1	0	0	0	0	0	0
AT1G80760	0	0	0	0	0	0	0	0	0	0	1	0	0	0	0
AT5G64330	1	0	0	0	0	0	0	0	0	0	0	0	0	0	0
AT3G18610	0	0	0	0	0	0	0	0	1	0	0	0	0	0	0
AT1G64980	1	0	0	0	0	0	0	0	0	0	0	0	0	0	0
AT3G55430	0	0	0	0	0	0	0	1	0	0	0	0	0	0	0
AT1G19300	1	0	0	0	0	0	0	1	0	0	0	0	0	0	0
AT1G42470	0	0	1	0	0	0	1	0	0	0	0	0	0	0	0
AT1G22530	1	0	1	1	0	0	1	0	0	0	0	0	0	0	0
AT5G04310	0	0	0	0	0	0	0	1	0	0	0	0	0	0	0
AT1G53830	1	0	1	1	1	0	0	1	0	0	0	0	0	0	0
AT5G45280	1	0	1	1	1	0	0	0	0	0	0	0	0	0	0
AT1G61870	0	0	0	0	0	0	0	0	1	0	0	0	0	0	0
AT1G30870	1	0	0	1	1	0	0	0	0	0	0	0	0	0	1
AT3G28200	1	0	0	0	0	0	0	0	0	0	0	0	0	0	0
AT4G26010	1	0	0	1	1	0	0	0	0	0	0	0	0	0	0
AT2G47860	0	0	0	0	0	0	1	0	0	0	0	0	0	0	0
AT5G48800	1	0	0	0	0	0	0	0	0	0	0	0	0	0	0
AT1G25540	0	0	0	0	0	0	0	0	1	0	0	0	0	0	0
AT2G01420	1	0	0	0	0	0	0	0	0	0	0	0	0	0	0
AT2G34650	0	0	0	1	0	0	0	0	0	0	0	0	0	0	0
AT4G35470	1	0	0	0	0	0	0	0	0	0	0	0	0	0	0
AT2G44230	0	0	0	0	0	0	0	0	0	0	1	1	0	1	0
AT3G18710	1	0	0	0	0	0	0	0	0	0	0	0	0	0	0
AT5G41080	1	0	0	0	0	0	0	0	0	0	0	0	0	0	0
AT5G05500	1	0	0	1	1	0	0	0	0	0	0	0	0	0	1
AT5G06860	0	0	0	0	0	0	0	1	1	0	0	0	0	0	0
AT2G40540	1	0	0	0	0	0	0	0	0	0	0	0	0	0	0
AT5G07110	1	0	1	0	0	0	1	0	0	0	0	0	0	0	0
AT1G17700	1	0	1	1	0	0	0	0	0	0	0	0	0	0	0
AT1G54970	1	0	0	0	0	0	0	0	0	0	0	0	0	0	1
AT3G13690	1	0	0	0	0	0	0	0	0	0	0	0	0	0	0
AT1G51170	0	0	0	0	0	0	1	0	1	0	0	0	0	0	0
AT1G69790	0	0	0	0	0	0	0	0	1	0	0	0	0	0	0
AT2G47060	1	0	0	0	0	0	0	0	0	1	0	0	0	0	0
AT4G25390	0	0	0	0	1	0	0	0	0	0	0	0	0	0	0
AT3G24715	1	0	1	0	0	0	0	0	0	0	0	0	0	0	0
AT3G46280	1	0	0	0	1	0	0	0	0	0	0	0	0	0	0
AT1G10020	1	0	0	0	0	0	1	0	0	0	0	0	0	0	0
AT3G19680	1	0	0	0	0	0	0	0	0	0	0	0	0	0	0
AT4G27350	0	0	0	0	0	0	0	0	1	0	0	0	0	0	0
AT3G62630	1	0	0	0	0	0	0	0	0	0	0	0	0	0	0
AT1G23070	0	0	0	0	0	0	0	0	1	0	0	0	0	0	0
AT5G47060	0	0	0	0	0	0	0	0	1	0	0	0	0	0	0
AT3G11420	1	0	0	0	0	0	0	1	0	0	0	0	0	0	0
AT2G23790	0	0	0	0	0	0	1	0	0	0	0	0	0	0	0
AT1G28240	1	0	0	0	0	0	0	0	0	0	0	0	0	0	0
AT3G55720	0	0	0	0	0	0	0	0	1	0	0	0	0	0	0
AT5G63820	0	0	1	0	0	0	0	0	0	0	0	0	0	0	0
AT5G51670	1	0	1	0	1	0	1	0	0	0	0	0	0	0	0
AT1G80240	1	0	0	0	0	0	0	0	0	0	0	0	0	0	0
AT5G09840	0	0	0	0	0	0	0	0	1	0	0	0	0	0	0
AT4G27270	1	0	0	0	0	0	0	0	0	0	0	0	0	0	0
AT3G05490	1	0	0	0	0	0	0	0	0	0	0	0	0	0	0
AT3G02130	0	0	0	0	0	0	0	0	1	0	0	0	0	0	0
AT1G66350	1	0	0	1	0	0	0	0	0	0	0	0	0	0	0
AT5G17490	0	0	0	0	0	0	0	0	1	0	0	0	0	0	0
AT4G10150	1	0	1	0	0	0	0	0	0	0	0	0	0	0	0
AT5G41400	1	0	0	0	0	0	0	0	0	0	0	0	0	0	0
AT5G38940	1	0	0	1	1	0	0	0	0	1	0	0	0	0	0
AT1G78260	1	0	0	0	0	0	0	0	0	0	0	0	0	0	0
AT4G02270	1	0	0	1	1	0	0	0	0	0	1	0	0	0	0
AT5G67400	1	0	0	1	1	0	0	0	0	0	0	0	0	0	1
AT2G41380	1	0	0	0	0	0	0	0	0	0	0	0	0	0	0
AT1G27730	0	0	0	0	0	0	0	0	1	0	0	0	0	0	0
AT1G29430	1	0	0	0	0	0	0	0	0	0	0	1	0	0	0
AT4G12410	1	0	0	1	1	0	0	0	0	0	0	0	0	0	0
AT4G34760	1	0	1	0	0	0	0	0	0	0	0	0	0	0	0
AT5G18080	0	0	0	0	0	0	1	0	0	0	0	0	0	0	0
AT4G35070	0	0	1	0	0	0	0	0	0	0	0	0	0	0	0
AT4G09160	1	0	0	0	0	0	0	0	0	0	0	0	0	0	0
AT1G30690	1	0	0	0	0	0	0	0	0	0	0	0	0	0	0
AT3G23800	1	0	1	1	1	0	1	0	0	0	0	0	0	0	0
AT2G47270	1	0	0	0	0	0	0	0	0	0	0	0	0	0	0
AT4G26690	1	0	0	0	0	0	0	1	0	0	0	0	0	0	0
AT3G05230	1	0	0	0	0	0	0	0	0	0	0	0	0	0	0
AT1G77330	1	0	1	1	1	0	0	0	0	0	0	0	0	0	0
AT5G66920	1	0	1	1	1	0	0	0	0	0	0	0	0	0	0
AT5G48450	1	0	1	0	0	0	0	1	0	0	0	0	0	0	0
AT1G03790	0	0	1	1	1	0	0	0	1	0	0	0	0	0	0
AT2G29210	0	0	0	0	0	0	0	0	1	0	0	0	0	0	0
AT5G50670	1	0	0	0	0	0	0	0	0	0	0	0	0	0	0
AT1G67650	0	0	0	0	0	0	0	0	1	0	0	0	0	0	0
AT2G02480	1	0	0	0	0	0	0	0	0	0	0	0	0	0	0
AT3G51895	0	0	1	1	1	0	0	0	0	0	1	0	0	0	0
AT1G23090	1	0	0	0	0	0	0	0	0	0	0	0	0	0	0
AT2G31880	1	0	0	0	0	0	0	0	0	0	0	0	0	0	0
AT5G13820	1	0	0	0	0	0	0	0	0	0	0	0	0	0	0
AT2G47440	1	0	0	0	0	0	0	0	0	0	0	0	0	0	0
AT3G13150	0	0	0	0	0	0	0	0	1	0	0	0	0	0	0
AT5G54380	1	0	0	0	0	0	0	0	0	0	0	0	0	0	0
AT1G21400	0	0	0	0	0	0	1	0	0	0	0	0	0	0	0
AT1G70950	1	0	0	0	0	0	0	0	0	0	0	0	0	0	0
AT2G18900	0	0	0	0	0	0	0	0	1	0	0	0	0	0	0
AT5G54200	1	0	0	0	0	0	0	0	0	0	0	0	0	0	0
AT2G39130	1	0	0	0	0	0	0	0	0	0	0	0	0	0	0
AT4G09820	0	0	0	0	0	0	0	0	0	1	1	0	0	0	0
AT1G80020	0	0	0	0	0	0	0	0	1	0	0	0	0	0	0
AT2G15490	0	0	0	0	0	0	0	0	1	0	0	0	0	0	0
AT4G19460	0	0	0	0	0	0	0	0	0	0	1	0	0	0	0
AT5G49690	0	0	0	0	0	0	0	0	1	0	0	0	0	0	0
AT2G41830	1	0	0	0	0	0	0	0	0	0	0	0	0	0	0
AT4G00050	1	0	0	0	0	0	0	0	0	0	1	0	0	0	0
AT1G18620	1	0	0	0	0	0	0	0	0	0	0	0	0	0	0
AT1G19020	1	0	1	0	0	0	0	0	0	0	0	0	0	0	0
AT1G30240	0	0	0	0	0	0	0	0	1	0	0	0	0	0	0
AT1G53180	1	0	1	0	0	0	0	0	0	0	0	0	0	0	0
AT1G65490	0	0	0	0	0	0	0	0	0	0	0	0	1	0	0
AT2G18690	1	0	0	0	1	0	0	0	0	0	0	0	0	0	0
AT2G41230	0	0	0	0	0	0	0	0	1	0	0	0	0	0	0
AT3G06150	1	0	0	0	0	0	0	0	0	0	0	0	0	0	0
AT3G07210	1	0	0	0	0	0	0	0	0	0	0	0	0	0	0
AT3G11690	1	0	0	0	0	0	0	0	0	0	0	0	0	0	0
AT3G15115	0	0	0	0	0	0	1	0	0	0	0	0	0	0	0
AT3G45730	0	0	0	0	0	0	1	0	0	0	0	1	0	0	0
AT3G47510	1	0	0	0	0	0	0	0	0	0	0	0	0	0	0
AT4G24370	1	0	0	0	0	0	0	0	0	0	0	0	0	0	0
AT5G19340	1	0	0	0	0	0	0	0	0	0	0	0	0	0	0
AT5G24570	1	0	0	0	0	0	0	0	0	0	0	0	0	0	0
AT5G55620	1	0	0	0	0	0	0	0	0	0	1	1	0	1	1
AT5G57790	0	0	0	0	0	0	0	0	1	0	0	0	0	0	0
AT5G66800	1	0	0	0	0	0	0	0	0	0	0	1	0	0	0
AT1G28280	1	0	0	0	0	0	0	0	0	0	0	0	0	0	0
AT1G56510	0	0	0	0	0	0	0	0	0	0	1	0	0	0	0
AT3G03660	0	0	0	0	0	0	0	0	1	0	0	0	0	0	0
AT3G23730	1	0	0	0	0	0	0	1	0	0	0	0	0	0	0
AT4G30280	1	0	1	0	1	0	1	0	0	0	0	0	0	0	0
AT4G25810	1	0	1	0	0	0	0	0	0	0	0	0	0	0	0
AT3G62720	0	0	0	0	0	0	0	1	0	0	0	0	0	0	0
AT1G04610	1	0	0	0	0	0	0	0	0	0	0	0	0	0	0
AT4G27240	1	0	0	0	0	0	0	0	0	0	0	0	0	0	0
AT5G58620	0	0	0	0	0	0	0	0	1	0	0	0	0	0	0
AT1G21580	0	0	0	0	0	0	0	0	1	0	0	0	0	0	0
