# Supplementary material for: Hypocotyl Transcriptome Reveals Auxin Regulation of Growth-Promoting Genes through GA-Dependent and -Independent Pathways
Source: PLoS One. 2012 May 9;7(5):e36210. doi: 10.1371/journal.pone.0036210 (PMC3348943; doi:10.1371/journal.pone.0036210)
Supplement: Table S7 — Genes and microarray datasets presented in Figure 7B, auxin-repressed genes. (XLSX) [file pone.0036210.s012.xlsx]

## Sheet: Sheet1
Table S7. Microarray data and column identification for Figure 8A, auxin-repressed genes.
Locus ID	Gene Symbol or Description	Leivar Wtseed_WTD up in WTD	Nozue upG	Leivar WTRc_WTD down in WTRc	Leivar WTR1_pifqR1 down in pifqR1	Leivar WTD_pifqD down in pifqD	Nozue upG PIF4/5	Ma DL	Jamet	Leivar Wtseed_WTD down in WTD	Ma upL	Nozue upS	Leivar WTR1_pifqR1 up in pifqR1	Nozue upS PIF4/5	Leivar WTD_pifqD up in pifqD	Leivar WTRc_WTD up in WTRc
AT4G36830	(HOS3-1)	0	0	0	0	0	0	0	0	0	0	1	0	0	0	0
AT3G63210	(MARD1)	1	0	0	0	0	0	1	0	0	0	0	0	0	0	0
AT2G22770	(NAI1)	1	0	0	0	0	0	0	0	0	0	0	0	0	0	0
AT5G27350	(SFP1)	1	0	0	0	0	0	0	0	0	0	0	0	0	1	0
AT5G27360	(SFP2)	0	0	0	0	0	0	0	0	0	0	0	1	0	1	1
AT1G21410	(SKP2A)	0	0	0	0	0	0	0	0	1	0	1	0	0	0	0
AT1G77000	(SKP2B)	0	0	0	0	0	0	0	0	1	0	0	0	0	0	0
AT5G24150	(SQP1)	0	0	0	0	0	0	0	0	0	0	1	0	0	0	0
AT3G14770	(SWEET2)	0	0	0	0	0	0	0	0	0	0	1	1	0	1	1
AT1G70700	(TIFY7)	0	0	0	0	0	0	0	0	0	1	0	0	1	0	0
AT2G23600	ACETONE-CYANOHYDRIN LYASE (ACL)	1	0	0	0	0	0	0	0	0	0	0	1	0	1	1
AT1G76990	ACT DOMAIN REPEAT 3 (ACR3)	0	0	0	0	0	0	1	0	0	0	0	0	0	0	0
AT1G72030	Acyl-CoA N-acyltransferases (NAT) superfamily protein	0	0	0	0	0	0	0	0	0	0	1	1	0	1	1
AT3G62550	Adenine nucleotide alpha hydrolases-like superfamily protein	0	1	0	0	0	0	0	0	1	0	0	1	0	1	1
AT1G80050	ADENINE PHOSPHORIBOSYL TRANSFERASE 2 (APT2)	1	0	0	0	0	0	0	0	0	0	0	0	0	0	0
AT4G12440	ADENINE PHOSPHORIBOSYL TRANSFERASE 4 (APT4)	0	0	0	0	0	0	0	0	0	0	0	0	0	0	1
AT4G29700	Alkaline-phosphatase-like family protein	1	1	0	1	1	0	0	1	0	0	0	0	0	0	0
AT4G03060	ALKENYL HYDROXALKYL PRODUCING 2 (AOP2)	0	0	0	0	0	0	0	0	0	0	1	0	0	0	0
AT3G54720	ALTERED MERISTEM PROGRAM 1 (AMP1)	0	0	0	0	0	0	0	0	1	0	0	0	0	0	0
AT1G31820	Amino acid permease family protein	0	0	0	0	0	0	0	0	0	0	1	0	0	0	0
AT2G38760	ANNEXIN ARABIDOPSIS 3 (ANNAT3)	1	0	0	0	0	0	0	0	0	0	0	0	0	0	0
AT4G39940	APS-KINASE 2 (AKN2)	1	0	0	0	0	0	0	0	0	1	0	0	0	0	0
AT5G23660	ARABIDOPSIS HOMOLOG OF MEDICAGO TRUNCATULA MTN3 (MTN3)	1	0	0	0	0	0	1	0	0	0	0	0	0	0	0
AT4G32980	ARABIDOPSIS THALIANA HOMEOBOX GENE 1 (ATH1)	0	0	0	0	0	0	0	0	0	0	1	0	0	0	1
AT1G69440	ARGONAUTE7 (AGO7)	0	0	0	0	0	0	0	0	1	0	0	0	0	0	0
AT5G65010	ASPARAGINE SYNTHETASE 2 (ASN2)	0	0	0	0	0	0	0	0	0	1	0	1	0	1	1
AT3G02020	ASPARTATE KINASE 3 (AK3)	1	0	0	0	0	0	0	0	0	1	0	1	0	1	1
AT1G68520	B-box type zinc finger protein with CCT domain	1	1	0	0	0	0	0	0	0	0	0	1	0	1	1
AT1G68190	B-box zinc finger family protein	1	1	0	0	0	0	0	0	0	0	0	1	0	1	1
AT2G21320	B-box zinc finger family protein	0	0	0	0	0	0	0	0	1	0	1	0	0	1	1
AT4G17880	Basic helix-loop-helix (bHLH) DNA-binding family protein	0	0	0	0	0	0	1	0	0	0	1	0	0	0	0
AT5G15830	BASIC LEUCINE-ZIPPER 3 (bZIP3)	1	1	1	0	1	0	0	0	0	0	0	0	0	0	0
AT1G30260	BEST Arabidopsis thaliana protein match is: Galactosyltransferase family protein (TAIR:AT4G21060.1)	0	0	0	0	0	0	0	0	0	0	1	1	0	1	1
AT2G40435	BEST Arabidopsis thaliana protein match is: transcription regulators (TAIR:AT3G56220.1)	0	0	0	0	0	0	0	0	1	0	1	0	0	0	1
AT1G61820	BETA GLUCOSIDASE 46 (BGLU46)	1	0	0	0	0	0	0	0	0	0	0	0	0	0	0
AT1G48750	Bifunctional inhibitor/lipid-transfer protein/seed storage 2S albumin superfamily protein	0	0	0	0	0	0	0	0	1	0	0	0	0	0	0
AT3G49930	C2H2 and C2HC zinc fingers superfamily protein	1	0	0	1	1	0	0	0	0	0	0	0	0	0	0
AT2G38170	CATION EXCHANGER 1 (CAX1)	1	1	0	0	0	0	0	0	0	0	0	0	0	0	0
AT1G48260	CBL-INTERACTING PROTEIN KINASE 17 (CIPK17)	1	0	0	0	0	0	1	0	0	0	0	0	0	0	0
AT3G17510	CBL-INTERACTING PROTEIN KINASE 1 (CIPK1)	0	0	0	0	0	0	0	0	0	0	0	0	0	1	0
AT2G32530	CELLULOSE SYNTHASE-LIKE B3 (CSLB03)	0	0	0	0	0	0	0	0	0	1	0	0	0	0	0
AT2G32540	CELLULOSE SYNTHASE-LIKE B4 (CSLB04)	0	0	0	0	0	0	0	0	0	0	0	1	0	1	1
AT5G39210	CHLORORESPIRATORY REDUCTION 7 (CRR7)	1	0	0	0	0	0	0	0	0	0	1	1	0	0	0
AT4G37220	Cold acclimation protein WCOR413 family	1	0	0	0	0	0	0	0	0	0	0	1	0	0	0
AT3G02380	CONSTANS-LIKE 2 (COL2)	0	0	0	0	0	0	0	0	0	0	1	1	0	1	1
AT5G40690	CONTAINS InterPro DOMAIN/s: EF-Hand 1, calcium-binding site (InterPro:IPR018247)	1	0	0	0	0	0	1	0	0	0	0	0	0	0	0
AT1G76420	CUP SHAPED COTYLEDON3 (CUC3)	0	0	0	0	0	0	0	0	0	1	0	0	0	0	0
AT3G21870	CYCLIN P2;1 (CYCP2;1)	1	0	0	0	0	0	0	0	0	0	1	1	0	1	1
AT1G02300	Cysteine proteinases superfamily protein	1	1	0	0	0	0	0	0	0	0	0	1	0	1	1
AT2G27420	Cysteine proteinases superfamily protein	0	0	0	0	0	0	0	0	0	0	1	0	0	0	0
AT3G48350	Cysteine proteinases superfamily protein	1	0	0	0	0	0	0	0	0	0	1	0	0	1	1
AT3G13760	Cysteine/Histidine-rich C1 domain family protein	1	0	1	0	0	0	0	0	0	0	0	0	0	0	0
AT5G54040	Cysteine/Histidine-rich C1 domain family protein	1	0	0	0	0	0	0	0	0	0	0	0	0	0	0
AT2G46650	CYTOCHROME B5 ISOFORM C (CB5-C)	0	0	0	0	0	0	0	0	0	1	0	0	0	0	0
AT1G13080	CYTOCHROME P450 71B2 (CYP71B2)	1	0	0	0	0	0	0	0	0	0	1	0	0	0	0
AT3G44970	Cytochrome P450 superfamily protein	0	0	0	0	0	0	0	0	0	0	1	1	0	0	1
AT5G04330	Cytochrome P450 superfamily protein	0	0	0	0	0	0	0	1	0	0	1	0	0	0	0
AT5G47990	CYTOCHROME P450, FAMILY 705, SUBFAMILY A, POLYPEPTIDE 5 (CYP705A5)	1	1	0	0	0	0	1	0	0	0	0	0	0	0	0
AT4G12320	CYTOCHROME P450, FAMILY 706, SUBFAMILY A, POLYPEPTIDE 6 (CYP706A6)	0	0	0	0	0	0	0	0	0	0	0	1	0	1	1
AT3G26290	CYTOCHROME P450, FAMILY 71, SUBFAMILY B, POLYPEPTIDE 26 (CYP71B26)	0	0	0	0	0	0	0	0	1	0	0	0	0	0	0
AT2G34490	CYTOCHROME P450, FAMILY 710, SUBFAMILY A, POLYPEPTIDE 2 (CYP710A2)	0	0	0	0	0	0	0	0	0	0	0	0	0	0	1
AT1G67110	CYTOCHROME P450, FAMILY 735, SUBFAMILY A, POLYPEPTIDE 2 (CYP735A2)	0	1	0	0	0	0	0	0	0	0	0	0	0	0	0
AT1G13710	CYTOCHROME P450, FAMILY 78, SUBFAMILY A, POLYPEPTIDE 5 (CYP78A5)	0	0	0	0	0	0	0	0	0	1	0	0	0	0	0
AT4G39510	CYTOCHROME P450, FAMILY 96, SUBFAMILY A, POLYPEPTIDE 12 (CYP96A12)	0	0	0	0	0	0	0	0	1	0	1	1	0	1	1
AT5G03700	D-mannose binding lectin protein with Apple-like carbohydrate-binding domain	0	0	0	0	0	0	0	0	1	0	0	0	0	0	0
AT4G39130	Dehydrin family protein	0	0	0	0	0	0	0	0	1	0	1	0	0	0	0
AT3G01920	DHBP synthase RibB-like alpha/beta domain	0	0	0	0	0	0	0	0	1	0	0	0	0	0	0
AT3G55630	DHFS-FPGS HOMOLOG D (DFD)	1	0	0	0	0	0	0	0	0	0	1	1	0	1	0
AT5G42800	DIHYDROFLAVONOL 4-REDUCTASE (DFR)	0	0	0	0	0	0	0	0	0	1	0	0	1	0	1
AT5G67190	DREB AND EAR MOTIF PROTEIN 2 (DEAR2)	0	0	0	0	0	0	1	0	1	0	0	0	0	0	0
AT1G49010	Duplicated homeodomain-like superfamily protein	1	0	0	0	0	0	0	0	0	0	1	1	0	1	1
AT1G18330	EARLY-PHYTOCHROME-RESPONSIVE1 (EPR1)	0	0	0	0	0	0	0	0	0	0	1	0	0	1	1
AT4G37980	ELICITOR-ACTIVATED GENE 3-1 (ELI3-1)	0	0	0	0	0	0	0	0	0	0	1	1	0	0	0
AT4G21190	EMBRYO DEFECTIVE 1417 (emb1417)	0	0	0	0	0	0	0	0	1	0	0	0	0	0	0
AT2G43530	Encodes a defensin-like (DEFL) family protein.	1	0	0	0	0	0	0	0	0	0	1	1	0	1	1
AT2G43535	Encodes a defensin-like (DEFL) family protein.	1	0	0	0	0	0	0	0	0	0	0	0	0	0	0
AT4G16750	encodes a member of the DREB subfamily A-4 of ERF/AP2 transcription factor family.	0	0	0	0	0	0	0	0	0	0	1	0	0	0	0
AT5G07580	encodes a member of the ERF (ethylene response factor) subfamily B-3 of ERF/AP2 transcription factor family.	1	0	0	0	0	0	0	0	0	0	0	0	0	0	0
AT5G61590	encodes a member of the ERF (ethylene response factor) subfamily B-3 of ERF/AP2 transcription factor family.	0	1	0	0	0	0	0	0	1	0	0	1	0	0	0
AT5G38020	encodes a protein whose sequence is similar to SAM:salicylic acid carboxyl methyltransferase (SAMT) (GI:6002712)(Clarkia breweri)	0	0	0	0	0	0	0	0	0	1	0	1	0	1	1
AT5G58260	Encodes subunit NDH-N of NAD(P)H:plastoquinone dehydrogenase complex (Ndh complex) present in the thylakoid membrane of chloroplasts.	1	0	0	0	0	0	0	0	0	0	1	1	0	1	1
AT1G68110	ENTH/ANTH/VHS superfamily protein	0	1	0	0	0	0	0	0	0	0	0	0	0	0	0
AT1G08920	ERD (EARLY RESPONSE TO DEHYDRATION) SIX-LIKE 1 (ESL1)	1	0	0	0	0	0	0	0	0	1	1	0	0	0	1
AT3G20015	Eukaryotic aspartyl protease family protein	1	0	0	0	0	0	1	0	0	0	0	0	0	0	0
AT4G16563	Eukaryotic aspartyl protease family protein	0	0	0	0	0	0	0	1	0	0	0	0	0	0	0
AT2G24580	FAD-dependent oxidoreductase family protein	0	0	0	0	0	0	1	0	0	0	0	0	0	0	0
AT3G23410	FATTY ALCOHOL OXIDASE 3 (FAO3)	0	0	0	0	0	0	0	0	0	0	1	0	0	1	1
AT5G61290	Flavin-binding monooxygenase family protein	1	0	0	0	0	0	0	0	0	0	0	0	0	0	0
AT1G62540	FLAVIN-MONOOXYGENASE GLUCOSINOLATE S-OXYGENASE 2 (FMO GS-OX2)	0	0	0	0	0	0	0	0	0	0	1	0	0	0	0
AT1G62560	FLAVIN-MONOOXYGENASE GLUCOSINOLATE S-OXYGENASE 3 (FMO GS-OX3)	0	0	0	0	0	0	0	0	0	0	1	0	0	0	0
AT2G28110	FRAGILE FIBER 8 (FRA8)	1	0	1	0	0	0	1	1	0	0	0	0	0	0	0
AT2G47180	GALACTINOL SYNTHASE 1 (GolS1)	0	0	1	0	1	0	0	0	1	0	1	0	0	0	0
AT3G01260	Galactose mutarotase-like superfamily protein	1	1	0	0	0	0	0	0	0	0	0	0	0	0	0
AT2G44130	Galactose oxidase/kelch repeat superfamily protein	1	0	0	0	0	0	1	0	0	0	0	1	0	1	0
AT4G32940	GAMMA VACUOLAR PROCESSING ENZYME (GAMMA-VPE)	1	0	0	0	0	0	1	1	0	0	0	0	0	0	0
AT2G27360	GDSL-like Lipase/Acylhydrolase superfamily protein	1	0	0	0	0	0	1	0	0	0	0	0	0	0	0
AT5G08460	GDSL-like Lipase/Acylhydrolase superfamily protein	0	0	0	0	0	0	1	0	0	0	0	0	0	0	0
AT1G50960	GIBBERELLIN 2-OXIDASE 7 (GA2OX7)	0	0	0	0	0	0	0	0	0	0	1	0	0	0	0
AT1G03850	Glutaredoxin family protein	1	1	0	0	0	0	0	0	0	0	0	0	0	0	0
AT4G30450	glycine-rich protein	1	0	0	0	0	0	0	1	0	0	0	0	0	0	0
AT5G56100	glycine-rich protein / oleosin	0	0	0	0	0	0	1	0	1	0	0	1	0	1	0
AT3G21260	Glycolipid transfer protein (GLTP) family protein	1	0	0	0	0	0	0	0	0	0	0	1	0	1	1
AT1G21360	GLYCOLIPID TRANSFER PROTEIN 2 (GLTP2)	1	0	0	0	0	0	1	0	0	0	0	0	0	0	0
AT2G41250	Haloacid dehalogenase-like hydrolase (HAD) superfamily protein	0	0	0	0	0	0	0	0	0	0	1	1	0	0	0
AT5G59720	HEAT SHOCK PROTEIN 18.2 (HSP18.2)	0	0	0	0	0	0	0	0	0	0	1	0	0	0	0
AT4G21320	HEAT-STRESS-ASSOCIATED 32 (HSA32)	0	0	0	0	0	0	0	0	1	0	0	0	0	0	0
AT5G39760	HOMEOBOX PROTEIN 23 (HB23)	1	0	0	0	0	0	0	0	0	0	0	0	0	0	0
AT2G33880	HOMEOBOX-3 (HB-3)	0	0	0	0	0	0	0	0	1	0	0	0	0	0	0
AT3G22740	HOMOCYSTEINE S-METHYLTRANSFERASE 3 (HMT3)	0	0	0	0	0	0	0	0	1	0	0	0	0	0	0
AT4G21870	HSP20-like chaperones superfamily protein	1	0	0	0	0	0	0	0	0	1	0	0	0	0	0
AT1G44160	HSP40/DnaJ peptide-binding protein	1	0	0	0	0	0	1	0	0	0	0	0	0	0	0
AT3G29670	HXXXD-type acyl-transferase family protein	0	0	0	0	0	0	0	0	1	0	0	0	0	0	0
AT3G50300	HXXXD-type acyl-transferase family protein	0	0	0	0	0	0	0	0	0	0	1	0	0	0	0
AT5G47980	HXXXD-type acyl-transferase family protein	0	1	0	0	0	0	0	0	0	0	0	0	0	0	0
AT4G15440	HYDROPEROXIDE LYASE 1 (HPL1)	0	0	0	0	0	0	0	0	0	0	1	0	0	0	0
AT2G33990	IQ-DOMAIN 9 (iqd9)	1	0	1	0	0	0	1	0	0	0	0	0	0	0	0
AT1G60960	IRON REGULATED TRANSPORTER 3 (IRT3)	1	0	0	0	0	0	0	0	0	0	0	0	0	0	0
AT1G49490	Leucine-rich repeat (LRR) family protein	0	0	0	0	0	0	0	1	0	0	0	0	0	0	0
AT5G58500	LIGHT SENSITIVE HYPOCOTYLS 5 (LSH5)	0	0	0	0	0	0	1	0	0	0	0	0	0	0	0
AT1G72500	LOCATED IN: plasma membrane	1	0	0	1	0	0	0	0	0	0	1	0	0	0	1
AT1G32540	LSD ONE LIKE 1 (LOL1)	1	1	0	0	0	0	0	0	0	0	0	1	0	1	1
AT4G33150	lysine-ketoglutarate reductase/saccharopine dehydrogenase bifunctional enzyme	1	0	0	0	0	0	1	0	0	0	0	0	0	0	0
AT1G54730	Major facilitator superfamily protein	0	0	0	0	0	0	0	0	1	0	0	0	0	0	0
AT1G68570	Major facilitator superfamily protein	0	0	0	0	0	0	0	0	1	0	1	0	0	0	0
AT2G40460	Major facilitator superfamily protein	0	0	0	0	0	0	0	0	0	0	1	0	0	0	0
AT3G21670	Major facilitator superfamily protein	0	0	0	0	0	0	0	0	0	0	1	0	0	0	1
AT3G53960	Major facilitator superfamily protein	0	0	0	0	0	0	0	0	0	0	1	0	0	0	0
AT4G34950	Major facilitator superfamily protein	0	1	0	0	0	0	0	0	0	1	0	0	0	0	0
AT1G52000	Mannose-binding lectin superfamily protein	0	0	0	0	0	0	0	0	0	1	1	0	0	0	0
AT1G52100	Mannose-binding lectin superfamily protein	1	0	0	0	0	0	0	0	0	0	0	0	0	1	0
AT3G16450	Mannose-binding lectin superfamily protein	1	0	0	0	0	0	0	0	0	0	0	0	0	0	0
AT5G55370	MBOAT (membrane bound O-acyl transferase) family protein	0	0	0	0	0	0	0	0	1	0	0	0	0	0	0
AT1G07610	METALLOTHIONEIN 1C (MT1C)	1	0	0	0	0	0	0	0	0	1	0	0	0	0	0
AT3G50440	METHYL ESTERASE 10 (MES10)	1	0	0	0	0	0	0	0	0	0	0	0	0	0	0
AT4G16690	METHYL ESTERASE 16 (MES16)	1	0	0	0	0	0	0	0	0	0	1	1	0	0	0
AT4G37150	METHYL ESTERASE 9 (MES9)	0	0	0	0	0	0	0	0	0	0	1	1	0	1	1
AT2G32510	MITOGEN-ACTIVATED PROTEIN KINASE KINASE KINASE 17 (MAPKKK17)	0	0	0	0	0	0	0	0	0	0	1	0	0	0	0
AT5G67080	MITOGEN-ACTIVATED PROTEIN KINASE KINASE KINASE 19 (MAPKKK19)	0	0	0	0	0	0	0	0	0	1	0	0	0	0	0
AT1G35310	MLP-LIKE PROTEIN 168 (MLP168)	0	0	0	0	0	0	0	0	0	1	0	0	0	0	0
AT1G24020	MLP-LIKE PROTEIN 423 (MLP423)	1	0	0	0	0	0	0	0	0	0	0	1	0	1	1
AT3G53200	MYB DOMAIN PROTEIN 27 (MYB27)	1	0	1	0	0	0	0	0	0	0	0	0	0	0	0
AT5G61420	MYB DOMAIN PROTEIN 28 (MYB28)	0	0	0	0	0	0	0	0	0	1	1	0	0	0	1
AT5G07690	MYB DOMAIN PROTEIN 29 (MYB29)	0	0	0	0	0	0	0	0	0	0	1	0	0	0	0
AT5G60890	MYB DOMAIN PROTEIN 34 (MYB34)	1	0	0	0	0	0	0	0	0	0	0	0	0	0	0
AT3G48920	MYB DOMAIN PROTEIN 45 (MYB45)	1	0	0	0	0	0	0	0	0	0	0	0	0	0	0
AT3G46130	MYB DOMAIN PROTEIN 48 (MYB48)	1	0	0	0	0	0	1	0	0	0	1	0	0	0	0
AT5G59780	MYB DOMAIN PROTEIN 59 (MYB59)	1	1	1	0	0	0	1	0	0	0	0	0	0	0	0
AT3G15510	NAC DOMAIN CONTAINING PROTEIN 2 (NAC2)	1	0	0	0	0	0	1	0	0	0	0	0	0	0	0
AT1G07440	NAD(P)-binding Rossmann-fold superfamily protein	0	0	0	0	0	0	0	0	0	0	0	1	0	1	1
AT4G19170	NINE-CIS-EPOXYCAROTENOID DIOXYGENASE 4 (NCED4)	0	0	0	0	0	0	0	0	0	0	1	0	0	0	0
AT1G77760	NITRATE REDUCTASE 1 (NIA1)	0	1	0	0	0	0	0	0	1	1	0	1	0	1	1
AT1G70260	nodulin MtN21 /EamA-like transporter family protein	0	0	0	0	0	0	1	0	0	0	0	0	0	0	0
AT2G37450	nodulin MtN21 /EamA-like transporter family protein	1	0	0	0	0	0	0	0	0	0	0	0	0	1	0
AT2G37460	nodulin MtN21 /EamA-like transporter family protein	1	0	0	0	0	0	0	0	0	0	0	0	0	0	0
AT3G28130	nodulin MtN21 /EamA-like transporter family protein	1	0	0	0	0	0	0	0	0	0	0	0	0	0	0
AT4G01430	nodulin MtN21 /EamA-like transporter family protein	0	0	0	0	0	0	1	0	0	0	0	0	0	0	0
AT4G01450	nodulin MtN21 /EamA-like transporter family protein	1	0	0	0	0	0	0	1	0	0	0	0	0	0	0
AT4G08300	nodulin MtN21 /EamA-like transporter family protein	1	1	0	0	0	0	1	0	0	0	0	0	0	0	0
AT1G76790	O-methyltransferase family protein	1	1	0	1	1	0	0	1	0	1	0	0	0	0	0
AT1G73220	ORGANIC CATION/CARNITINE TRANSPORTER1 (1-Oct)	0	0	0	0	0	0	1	0	0	0	0	0	0	0	0
AT1G60590	Pectin lyase-like superfamily protein	0	0	0	0	0	0	0	1	0	0	1	1	0	1	1
AT3G15720	Pectin lyase-like superfamily protein	1	0	0	0	0	0	0	1	0	0	1	0	0	0	0
AT5G19730	Pectin lyase-like superfamily protein	0	0	0	0	0	0	0	0	0	0	1	0	0	0	0
AT1G56700	Peptidase C15, pyroglutamyl peptidase I-like	1	0	0	0	0	0	0	0	0	0	0	0	0	0	0
AT5G62130	Per1-like family protein	0	0	0	0	0	0	0	0	0	0	1	0	0	0	0
AT3G47430	PEROXIN 11B (PEX11B)	0	0	0	0	0	0	0	0	0	0	1	1	0	0	1
AT4G02850	phenazine biosynthesis PhzC/PhzF family protein	0	0	0	0	0	0	0	0	0	0	0	1	0	1	1
AT5G52120	PHLOEM PROTEIN 2-A14 (PP2-A14)	0	0	0	0	0	0	1	0	0	0	0	1	0	1	0
AT4G35530	phosphatidylinositolglycan-related	0	0	0	0	0	0	0	0	1	0	0	0	0	0	0
AT1G19150	PHOTOSYSTEM I LIGHT HARVESTING COMPLEX GENE 6 (LHCA6)	1	0	0	0	0	0	0	0	0	0	0	1	0	1	1
AT3G22104	Phototropic-responsive NPH3 family protein	0	0	0	0	0	0	0	0	1	0	0	0	0	0	1
AT1G18810	phytochrome kinase substrate-related	0	0	0	0	0	0	0	0	0	0	1	1	0	1	1
AT4G02075	PITCHOUN 1 (PIT1)	1	0	0	0	0	0	1	0	0	0	0	0	0	0	0
AT2G45220	Plant invertase/pectin methylesterase inhibitor superfamily	1	0	0	0	0	0	0	0	0	1	1	0	0	0	0
AT3G03700	Plasma-membrane choline transporter family protein	1	0	0	0	0	0	0	0	0	0	0	0	0	0	0
AT3G16670	Pollen Ole e 1 allergen and extensin family protein	0	0	0	0	0	0	0	0	0	0	0	0	1	1	0
AT4G17215	Pollen Ole e 1 allergen and extensin family protein	1	0	0	0	0	0	0	0	0	0	0	0	0	0	0
AT5G41050	Pollen Ole e 1 allergen and extensin family protein	1	0	0	0	0	0	0	0	0	0	1	1	0	1	1
AT1G56650	PRODUCTION OF ANTHOCYANIN PIGMENT 1 (PAP1)	0	0	0	0	0	0	0	0	0	0	1	0	0	0	1
AT2G18890	Protein kinase superfamily protein	1	0	0	0	0	0	0	0	0	0	0	0	0	0	0
AT4G10390	Protein kinase superfamily protein	0	0	0	0	0	0	0	0	1	0	0	0	0	0	0
AT1G72510	Protein of unknown function (DUF1677)	1	0	0	0	0	0	0	0	0	0	0	0	0	0	0
AT2G05910	Protein of unknown function (DUF567)	1	0	0	0	0	0	0	0	0	0	0	0	0	0	0
AT1G74940	Protein of unknown function (DUF581)	1	0	0	1	0	0	1	0	0	0	0	0	0	0	0
AT1G78020	Protein of unknown function (DUF581)	1	0	0	0	0	0	0	0	0	1	1	0	0	0	1
AT3G28270	Protein of unknown function (DUF677)	0	0	0	0	0	0	0	0	0	0	1	0	0	0	0
AT1G43020	Protein of unknown function, DUF547	1	0	0	0	0	0	0	0	0	0	0	0	0	0	0
AT1G11700	Protein of unknown function, DUF584	0	0	0	0	0	0	0	0	0	0	1	0	0	0	1
AT3G01440	PSBQ-LIKE 1 (PQL1)	1	0	0	0	0	0	0	0	0	0	1	1	0	1	1
AT2G01890	PURPLE ACID PHOSPHATASE 8 (PAP8)	1	0	0	0	0	0	1	1	0	0	1	1	0	1	1
AT2G38310	PYR1-LIKE 4 (PYL4)	1	0	0	0	0	0	0	0	0	0	0	0	0	0	0
AT3G08860	PYRIMIDINE 4 (PYD4)	0	0	0	0	0	0	0	0	0	0	1	0	0	0	0
AT5G53160	REGULATORY COMPONENTS OF ABA RECEPTOR 3 (RCAR3)	1	1	0	0	0	0	0	0	0	0	0	0	0	0	0
AT1G74890	RESPONSE REGULATOR 15 (ARR15)	0	0	0	0	0	0	0	0	0	1	0	0	0	0	0
AT1G10470	RESPONSE REGULATOR 4 (ARR4)	1	0	0	0	0	0	0	0	0	0	0	0	0	0	1
AT3G48100	RESPONSE REGULATOR 5 (RR5)	1	1	0	0	0	0	1	0	0	0	0	0	0	0	0
AT1G19050	RESPONSE REGULATOR 7 (ARR7)	1	0	0	0	0	0	0	0	0	0	1	0	0	0	1
AT3G45900	Ribonuclease P protein subunit P38-related	0	0	0	0	0	0	0	0	1	0	0	0	0	0	0
AT4G28270	RING MEMBRANE-ANCHOR 2 (RMA2)	1	0	0	0	0	0	0	0	0	0	0	0	0	0	0
AT2G37950	RING/FYVE/PHD zinc finger superfamily protein	0	0	0	0	0	0	1	0	0	0	0	0	0	0	0
AT1G22500	RING/U-box superfamily protein	0	1	1	0	0	0	0	0	1	0	0	0	0	0	0
AT1G72200	RING/U-box superfamily protein	1	0	1	0	0	0	0	0	0	0	0	0	0	0	0
AT3G10910	RING/U-box superfamily protein	0	0	0	0	0	0	0	0	0	0	1	0	0	0	0
AT5G01520	RING/U-box superfamily protein	0	0	0	1	0	0	0	0	0	0	1	0	0	0	0
AT5G24870	RING/U-box superfamily protein	0	0	0	0	0	0	0	0	1	0	1	0	0	0	0
AT5G47610	RING/U-box superfamily protein	1	0	0	0	0	0	0	0	0	0	1	0	0	1	1
AT5G39110	RmlC-like cupins superfamily protein	1	0	1	1	1	0	0	0	0	0	0	0	0	0	0
AT2G39705	ROTUNDIFOLIA LIKE 8 (RTFL8)	0	1	0	0	0	0	0	0	0	0	0	0	0	0	0
AT3G12830	SAUR-like auxin-responsive protein family	1	0	0	0	0	0	0	0	0	0	0	0	0	0	0
AT3G60690	SAUR-like auxin-responsive protein family	0	0	0	0	0	0	0	0	0	0	1	0	0	0	0
AT3G61900	SAUR-like auxin-responsive protein family	0	0	0	0	0	0	0	0	1	0	0	0	0	0	0
AT3G54990	SCHLAFMUTZE (SMZ)	0	0	0	0	0	0	0	0	0	0	1	0	0	0	1
AT4G35750	SEC14 cytosolic factor family protein / phosphoglyceride transfer family protein	0	1	0	0	0	0	1	0	0	0	0	0	0	0	0
AT3G57520	SEED IMBIBITION 2 (SIP2)	0	0	0	0	0	0	0	0	1	0	0	0	0	0	1
AT2G38180	SGNH hydrolase-type esterase superfamily protein	1	0	0	0	0	0	0	0	0	0	0	0	0	0	0
AT5G13730	SIGMA FACTOR 4 (SIG4)	0	0	0	0	0	0	0	0	0	0	1	1	0	0	0
AT1G78450	SOUL heme-binding family protein	0	0	0	0	0	0	0	0	0	0	0	0	0	0	1
AT4G22753	STEROL 4-ALPHA METHYL OXIDASE 1-3 (SMO1-3)	0	0	0	0	0	0	0	0	0	0	1	1	0	1	1
AT5G45650	subtilase family protein	0	0	0	0	0	0	0	1	0	0	1	0	0	0	1
AT5G48850	SULPHUR DEFICIENCY-INDUCED 1 (ATSDI1)	0	0	0	0	0	0	0	0	0	0	1	0	0	0	0
AT1G35560	TCP family transcription factor	0	0	0	0	0	0	0	0	0	0	1	0	0	0	0
AT2G19580	TETRASPANIN2 (TET2)	1	0	0	1	0	0	0	0	0	0	0	0	0	0	0
AT4G32340	Tetratricopeptide repeat (TPR)-like superfamily protein	1	1	0	0	0	0	0	0	0	0	0	0	0	0	0
AT5G48010	THALIANOL SYNTHASE 1 (THAS1)	1	1	0	0	0	0	0	0	0	0	0	0	0	0	0
AT5G25810	TINY (tny)	1	0	0	1	0	0	1	0	0	0	0	0	0	0	1
AT5G11590	TINY2 (TINY2)	0	0	0	0	0	0	0	0	0	0	1	0	0	0	0
AT1G63800	UBIQUITIN-CONJUGATING ENZYME 5 (UBC5)	1	0	0	0	0	0	1	0	0	0	0	0	0	0	0
AT4G34138	UDP-GLUCOSYL TRANSFERASE 73B1 (UGT73B1)	1	0	0	0	0	0	0	0	0	0	0	0	0	0	0
AT1G30530	UDP-GLUCOSYL TRANSFERASE 78D1 (UGT78D1)	0	0	0	0	0	0	0	0	0	0	1	0	0	1	1
AT4G15620	Uncharacterised protein family (UPF0497)	0	0	0	0	0	0	0	0	1	0	1	1	0	1	1
AT1G33055	unknown protein	0	1	1	0	0	0	1	0	1	0	0	0	0	0	0
AT1G66190	unknown protein	0	0	0	0	0	0	1	0	0	0	0	0	0	0	0
AT2G07000	unknown protein	0	0	0	0	1	0	0	0	0	0	0	0	0	0	0
AT2G15020	unknown protein	0	0	0	0	0	0	0	0	0	0	1	0	0	0	0
AT2G17710	unknown protein	1	0	0	0	0	0	1	0	0	0	0	0	0	0	0
AT2G21185	unknown protein	1	0	0	0	0	0	0	0	0	0	1	1	0	1	1
AT3G12320	unknown protein	0	0	0	0	0	0	0	0	1	0	1	0	0	1	0
AT3G19030	unknown protein	1	0	0	0	0	0	0	0	0	0	0	1	0	1	1
AT3G44450	unknown protein	0	0	0	1	0	0	0	0	0	0	0	0	1	0	0
AT3G52360	unknown protein	1	0	0	0	0	0	0	1	0	0	1	0	0	0	0
AT3G52480	unknown protein	1	0	0	0	0	0	1	0	0	0	0	0	0	0	0
AT4G10910	unknown protein	1	1	0	0	0	0	1	0	0	0	0	0	0	0	0
AT4G23493	unknown protein	0	0	0	0	0	0	0	0	0	0	1	0	0	0	0
AT4G23890	unknown protein	0	0	0	0	0	0	0	0	0	0	1	1	0	1	1
AT4G28290	unknown protein	1	0	0	0	0	0	0	0	0	0	1	0	0	0	0
AT4G33666	unknown protein	0	0	0	0	0	0	0	0	0	0	0	1	0	1	1
AT4G33960	unknown protein	1	0	0	0	0	0	0	0	0	0	0	0	0	0	0
AT4G38060	unknown protein	1	0	0	0	0	0	1	0	0	0	1	0	0	0	0
AT4G39675	unknown protein	0	0	1	0	0	0	0	0	0	0	0	0	0	0	0
AT5G04000	unknown protein	0	0	0	1	0	0	0	0	1	0	1	0	0	0	0
AT5G05250	unknown protein	0	1	0	0	0	0	0	1	1	0	0	0	0	0	0
AT5G19970	unknown protein	1	0	0	0	0	0	0	0	0	0	1	0	0	0	0
AT5G23920	unknown protein	1	0	0	0	0	0	0	0	0	0	1	0	0	0	0
AT5G24165	unknown protein	1	0	0	0	0	0	0	0	0	0	0	0	0	0	0
AT5G38980	unknown protein	1	0	0	0	0	0	0	1	0	1	1	1	0	1	1
AT5G49640	unknown protein	0	0	0	0	0	0	0	0	1	0	0	0	0	0	0
AT5G57510	unknown protein	0	0	0	0	0	0	1	0	0	0	0	0	0	0	0
AT5G61340	unknown protein	1	0	0	1	0	0	0	0	0	0	0	0	0	0	0
AT5G62900	unknown protein	0	0	0	0	0	0	1	0	0	0	0	0	0	0	0
AT5G66052	unknown protein	0	0	0	0	0	0	1	0	0	0	0	0	0	0	0
AT3G25190	Vacuolar iron transporter (VIT) family protein	1	0	0	0	0	0	0	0	0	0	0	0	1	0	0
AT2G41180	VQ motif-containing protein	1	0	1	0	0	0	0	0	0	0	0	0	0	0	0
AT3G22420	WITH NO K 2 (WNK2)	0	0	0	0	0	0	0	0	0	0	1	1	0	0	0
AT4G31800	WRKY DNA-BINDING PROTEIN 18 (WRKY18)	0	0	0	0	0	0	0	0	1	0	0	0	0	0	0
AT5G59340	WUSCHEL RELATED HOMEOBOX 2 (WOX2)	0	0	0	0	0	0	0	0	1	0	0	0	0	0	0
AT5G48720	X-RAY INDUCED TRANSCRIPT 1 (XRI1)	0	0	0	0	0	0	1	0	1	0	0	0	0	0	0
AT3G44990	XYLOGLUCAN ENDO-TRANSGLYCOSYLASE-RELATED 8 (XTR8)	1	0	0	0	0	0	0	1	0	0	0	0	0	0	0
AT2G36870	XYLOGLUCAN ENDOTRANSGLUCOSYLASE/HYDROLASE 32 (XTH32)	1	0	0	0	0	0	0	1	0	0	1	0	0	0	0
AT4G24120	YELLOW STRIPE LIKE 1 (YSL1)	0	0	0	0	0	0	0	0	0	0	1	1	0	0	0
AT2G40110	Yippee family putative zinc-binding protein	1	0	0	0	0	0	0	0	0	0	0	0	0	0	0
