# Supplementary material for: Hypocotyl Transcriptome Reveals Auxin Regulation of Growth-Promoting Genes through GA-Dependent and -Independent Pathways
Source: PLoS One. 2012 May 9;7(5):e36210. doi: 10.1371/journal.pone.0036210 (PMC3348943; doi:10.1371/journal.pone.0036210)
Supplement: Table S8 — Primer sequences used for quantitative RT-PCR. (XLSX) [file pone.0036210.s013.xlsx]

## Sheet: Sheet1
Table S8. Primer sequence for quantitative RT-PCR analyses.
Primer Name	Gene Symbol	Locus ID	5'->3' Primer Sequences (F/R)
HAT2 qRT_639F	HAT2	AT5G47370	AACGTCGAGGAAGAAGCTCAGG
HAT2 qRT_734R	HAT2	AT5G47370	AGCTTCTGTTTGGGATTGAGAGTG
GH3.1 qRT_374F	GH3.1	AT2G14960	CGATCGTCGCCAGCTTCTTTAC
GH3.1 qRT_433R	GH3.1	AT2G14960	CCCGGCACATACAAATTCATTACG
GH3.3 qRT_302F	GH3.3	AT2G23170	ACCGGAGATTCAACGTATTGCC
GH3.3 qRT_384R	GH3.3	AT2G23170	CAGAGCTTGTGAGGAACTCTGTG
WES1 qRT_399F	GH3.5	AT4G27260	CCATCTCTGAGTTCCTCACAAGC
WES1 qRT_471R	GH3.5	AT4G27260	TCCTCTTCGATTGTTGGCATTAGC
IAA5 qRT_343F	IAA5	AT1G15580	TCCGCTCTGCAAATTCTGTTCG
IAA5 qRT_484R	IAA5	AT1G15580	ACGATCCAAGGAACATTTCCCAAG
IAA19 qRT_1020F	IAA19	AT3G15540	GGTGACAACTGCGAATACGTTACCA
IAA19 qRT_1224R	IAA19	AT3G15540	CCCGGTAGCATCCGATCTTTTCA
SAUR15 qRT_24F	SAUR15	AT4G38850	TTGAGGAGTTTCTTGGGTGCTAAG
SAUR15 qRT_165R	SAUR15	AT4G38850	GCCATGAATCCTCTTGGTGTCG
